# Supplementary material for: A strategy to improve the efficiency of hole transporting materials: introduction of a highly symmetrical core
Source: Royal Society of Chemistry journal article supplement (doi:10.1039/c6nr06116h), 2016-01-01
Supplement: c6nr06116h1.pdf [file c6nr06116h1.pdf]

Strategy to improve the efficiency of hole transporting materials: introduction of  
highly symmetrical core

Wei-Jie Chi, Ping-Ping Sun and Ze-Sheng Li\*

Key Laboratory of Cluster Science of Ministry of Education, Beijing Key Laboratory  
of Photoelectronic/Electrophotonic Conversion Materials, School of Chemistry,  
Beijing Institute of Technology, Beijing 100081, China

\*Email: zeshengli@bit.edu.cn

## Computational details

Molecular stable dimers are obtained through two steps. Firstly, MD of 30 ps simulation are carried out at 298K in the NVE ensemble with a time step of 1 fs by using the DFTB+ 1.0.1 package to get rough dimeric structures. Secondly, the rough dimers with the lowest energies from dynamics simulation are selected as the starting geometries and optimized to their potential energy minimum at B3LYP/6-31G(d,p) level with Gaussian 09 program package.

The hole mobility of investigated molecules are calculated by using Einstein relation

$$u = \frac{1}{2n} \frac{e}{k_B T} \sum_i r_i^2 k_i P_i$$

where  $n$  is the spatial dimensionality and is 1 in our work,  $i$  is a selected hopping pathway,  $r_i$  represents the charge hopping centroid to centroid distance, and  $k_i$  denotes the charge hopping rate.

The charge hopping rate ( $k$ ) is expressed as:

$$k = \frac{4\pi^2}{h} v^2 \frac{1}{\sqrt{4\pi\lambda k_B T}} \exp\left[-\frac{\lambda}{4k_B T}\right]$$

where  $k_B$  is the Boltzmann constant,  $h$  denotes the Planck constant, and  $T$  represents the temperature in Kelvin. The  $\lambda$  represents reorganization energy, which is calculated by using the adiabatic potential energy surface method.  $v$  is transfer integral, which can be deduced directly from a direct approach at M06-2X/6-31G(d,p) level.

$$v = \langle \Psi_i^{HOMO} | F | \Psi_f^{HOMO} \rangle$$

where  $\Psi_i^{HOMO}$  and  $\Psi_f^{HOMO}$  represent the HOMOs of isolated molecules 1 and 2.  $F$  is the Fock operator for dimer, which can be calculated as:

$$F = SC\epsilon C^{-1}$$

$S$  denotes the overlap matrix for dimer. The Kohn-Sham orbital  $C$  and eigenvalue  $\varepsilon$  are evaluated by diagonalizing the zeroth-order Fock matrix.

$P_i$  is defined as the hopping probability, which can be obtained by:

$$P_i = \frac{k_i}{\sum_i k_i}$$

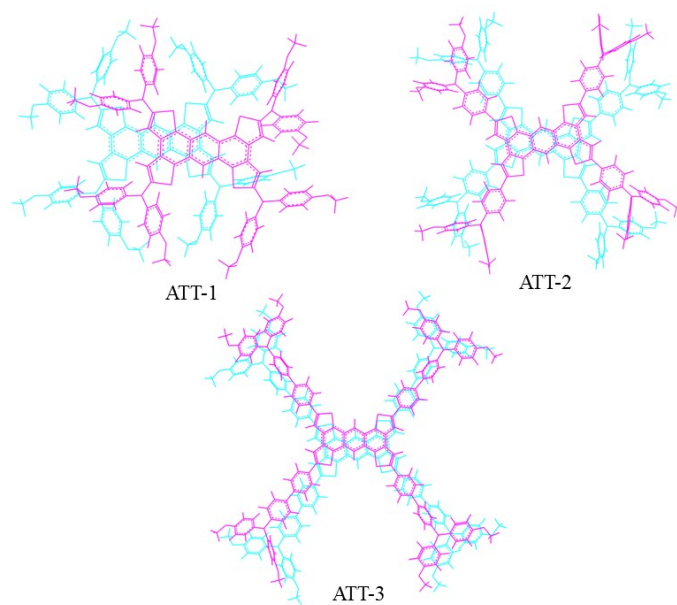

Figure S1. The geometry configurations of stable dimers for ATT derivatives.

Table S1. Hole mobility (calculated value:  $u_c$ ,  $\text{cm}^2\text{v}^{-1}\text{s}^{-1}$ ; experimental value:  $u_e$ ,  $\text{cm}^2\text{v}^{-1}\text{s}^{-1}$ ) of Spiro-OMeTAD, HTM1, and OMeTAD-TPA.

| Compounds    | $u_c$                 | $u_e$                 |
|--------------|-----------------------|-----------------------|
| Spiro-OMeTAD | $5.56 \times 10^{-3}$ | $1.30 \times 10^{-3}$ |
| HTM1         | $1.33 \times 10^{-6}$ | $6.0 \times 10^{-6}$  |
| OMeTAD-TPA   | $5.75 \times 10^{-4}$ | $1.08 \times 10^{-4}$ |

Table S2. The hole transfer integrals  $v$  (eV), the centroid to centroid distances ( $d$ , Å), hole hopping rate  $k$  (s<sup>-1</sup>), and hole mobilities ( $\mu$ , cm<sup>2</sup>v<sup>-1</sup>s<sup>-1</sup>) of investigated molecules.

| Compounds | $v$                    | $d$   | $k$                   | $\mu$ |
|-----------|------------------------|-------|-----------------------|-------|
| att-1     | 4.2x10 <sup>-2</sup>   | 4.995 | 8.08x10 <sup>12</sup> | 0.13  |
| att-2     | 5.71x10 <sup>-2</sup>  | 2.622 | 6.17x10 <sup>13</sup> | 0.27  |
| att-3     | -3.45x10 <sup>-2</sup> | 3.949 | 9.88x10 <sup>12</sup> | 0.099 |

Table S3 Calculated adiabatic ionization potentials ( $IP$ , eV), adiabatic electron affinity ( $EA$ , eV), and absolute harnesses ( $\eta$ , eV) of investigated molecules.

| Compounds    | $IP$ | $EA$ | $\eta$ |
|--------------|------|------|--------|
| Spiro-OMeTAD | 4.38 | 1.14 | 1.62   |
| ATT-1        | 4.41 | 1.94 | 1.24   |
| ATT-2        | 4.60 | 2.10 | 1.25   |
| ATT-3        | 4.67 | 2.21 | 1.23   |
